# Supplementary material
Source: Springer Nature journal article supplement (https://www.springermedizin.de/resource/supplementary/12990_2012_561_MOESM4_ESM.pdf/9613638)

A WT

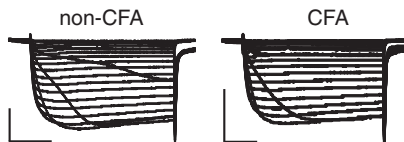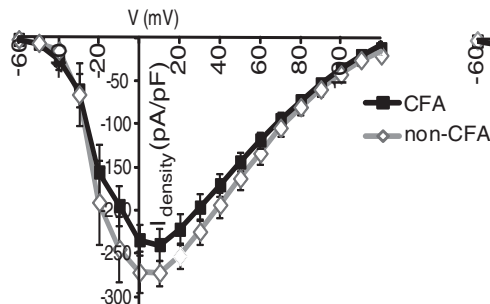

B KO

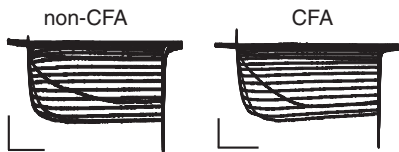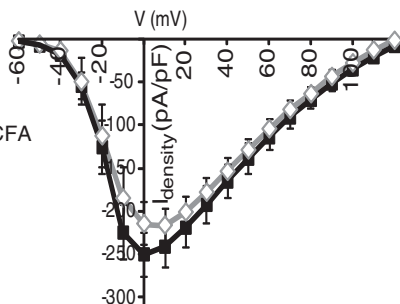

C WT

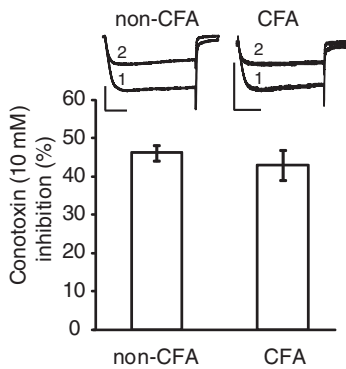

D KO

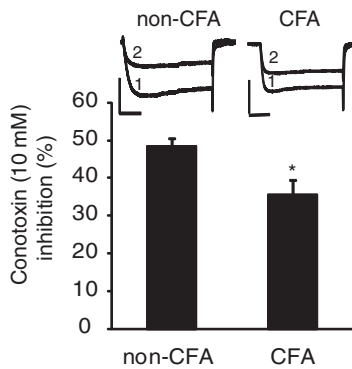

Supplement: MOESM4 [file 9613638]
